# Supplementary material
Source: publisher site journal article supplement (https://www.dovepress.com/article/335757)
Supplement: Supplementary file 1 [file get_supplementary_file.php]

## Supplemental figures and tables

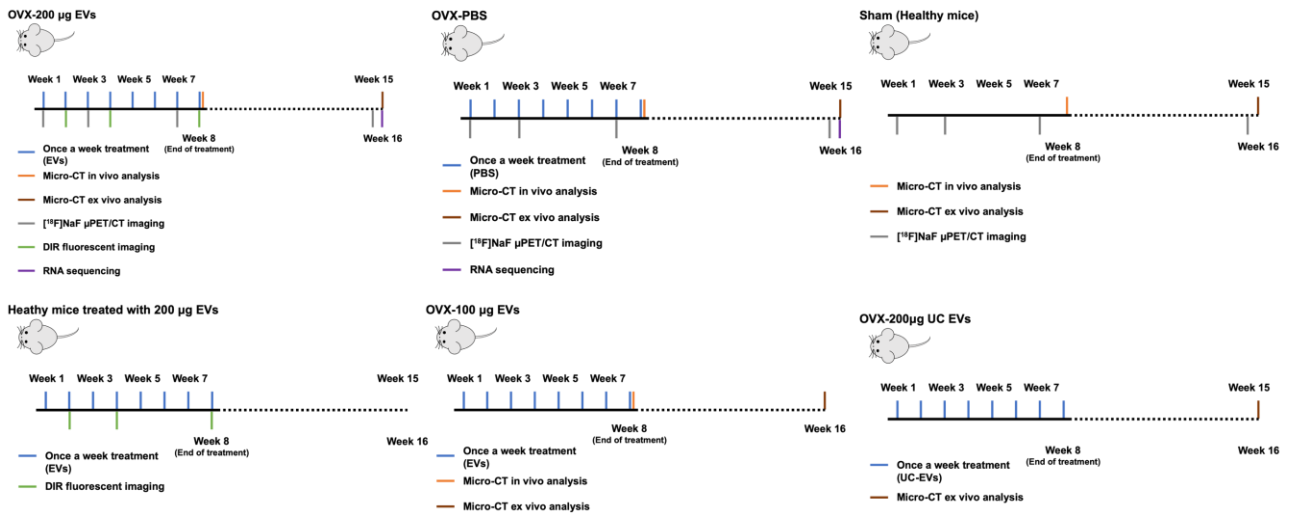

**Figure S1.** The design of the experiment. Different procedures used in animal studies were illustrated.

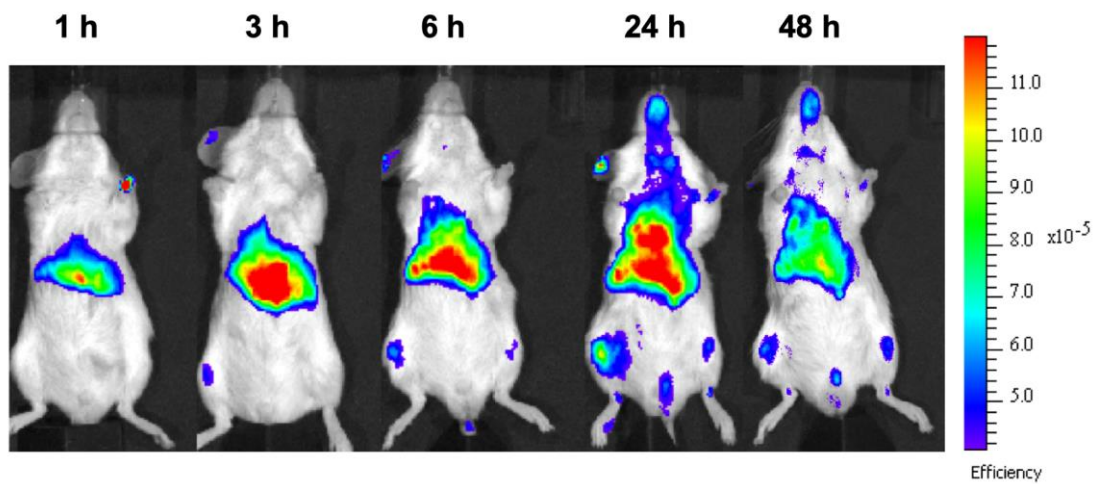

**Figure S2. Images of WJ-MSC-EVs labeled with DIR fluorescent.** The 200  $\mu\text{g}$  EVs labeled with DIR were systemically administrated into healthy BALB/c mice. The mice were imaged at 1, 3, 6, 24, 48 h after injection.

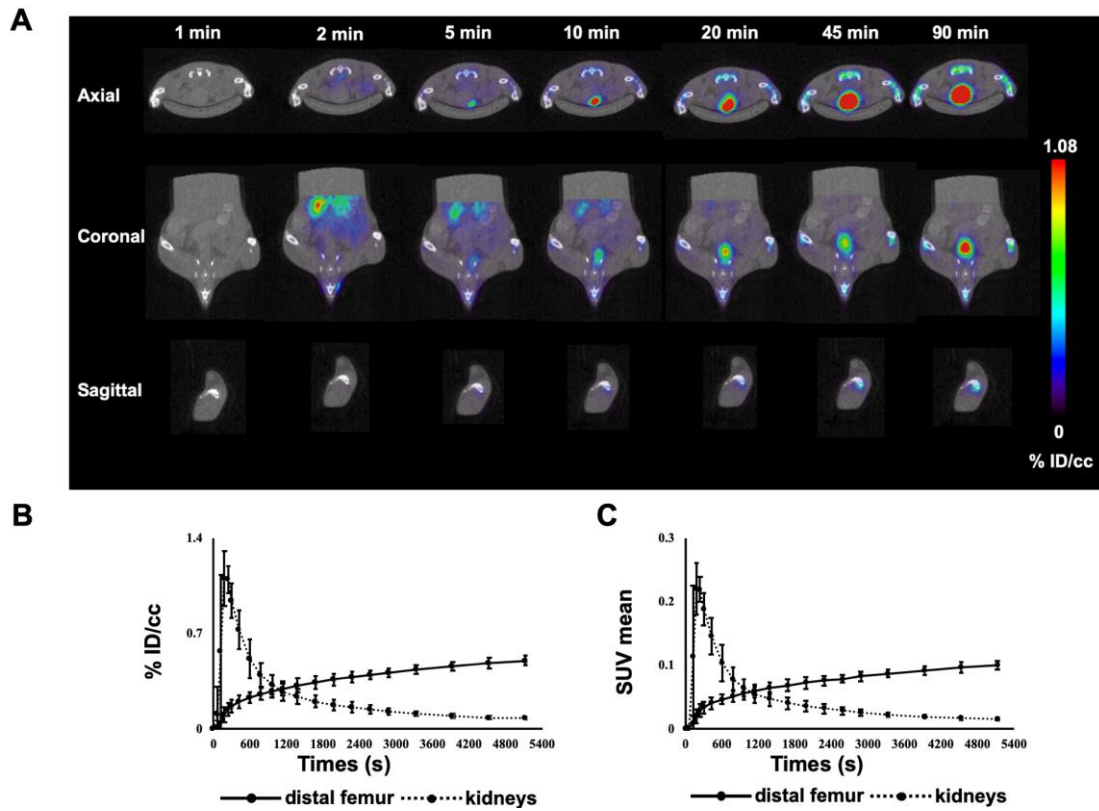

**Figure S3. Dynamic acquisition of  $[^{18}\text{F}]\text{NaF}$ .** (A) Dynamic imaging was performed by  $\mu\text{PET}/\text{CT}$  after injection, and images were shown in axial, coronal, sagittal views. (B, C) The time-activity relationship in ROIs at distal femur and kidneys of mice were analyzed and presented by %ID/cc and SUVmean.

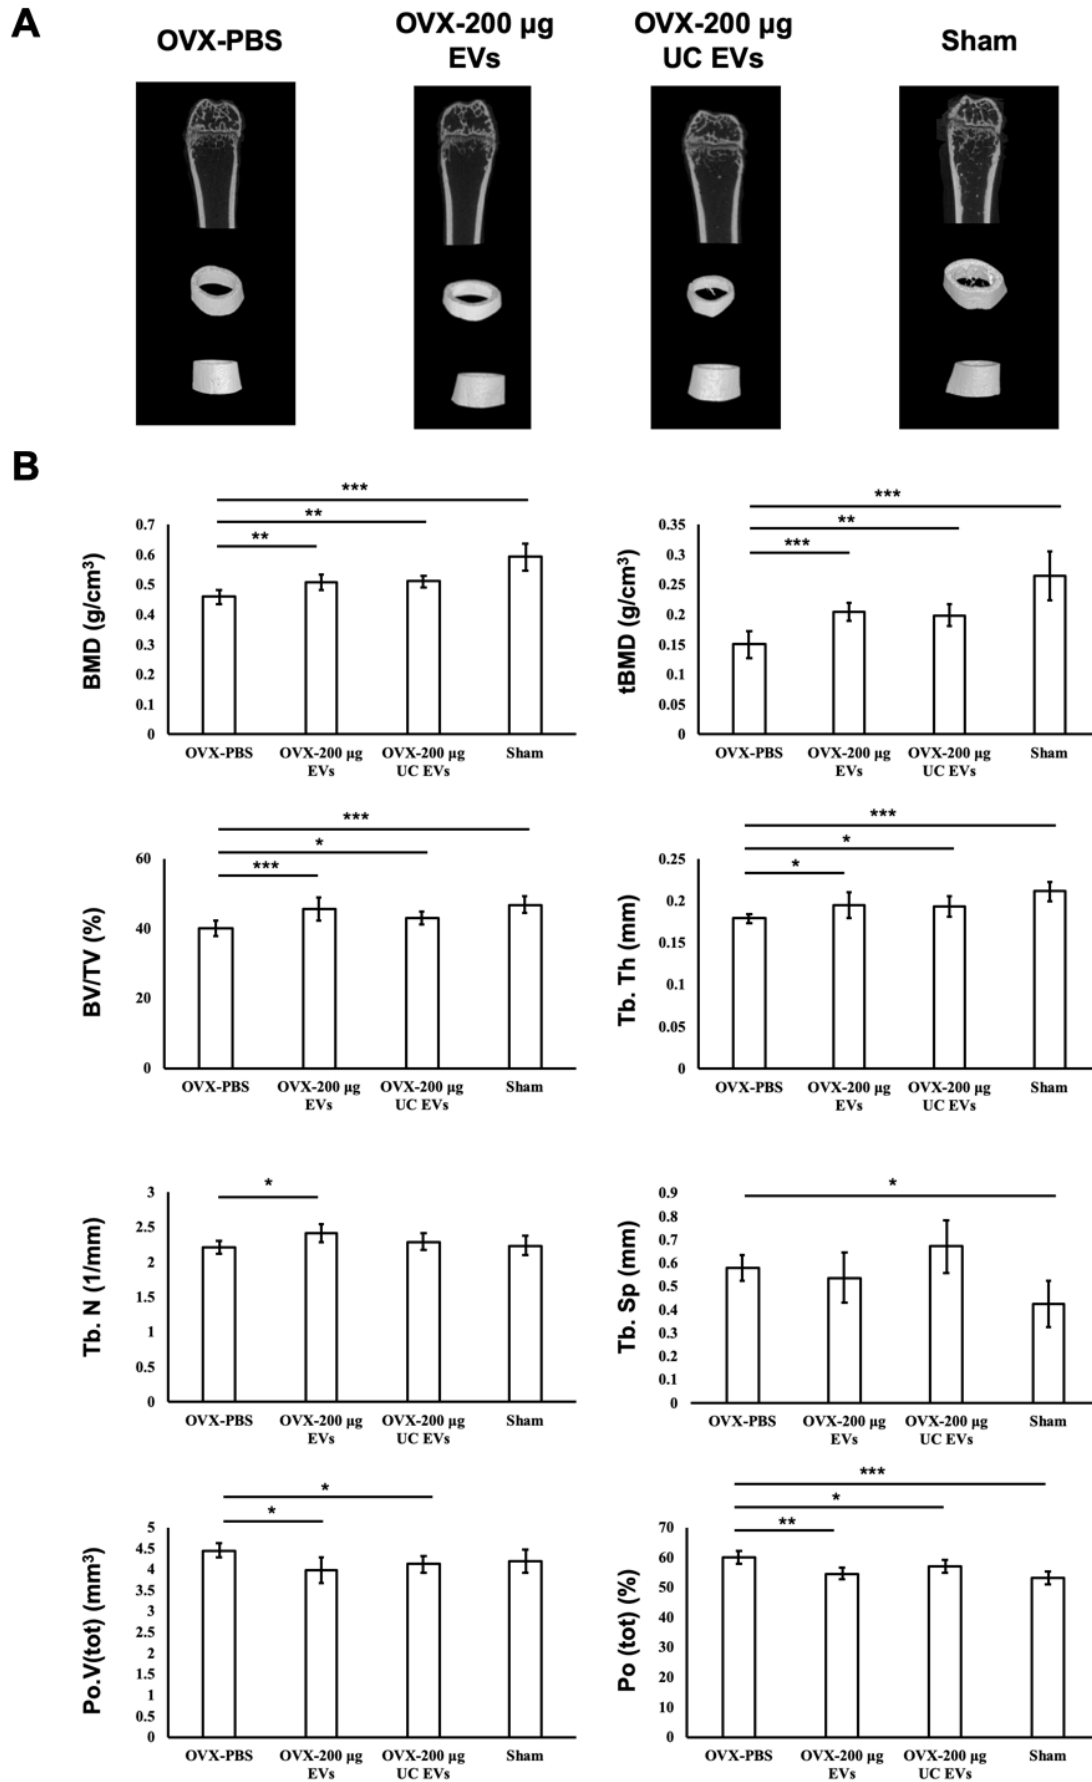

Figure S4. *Ex vivo*  $\mu$ CT imaging and quantitative analysis in OVX-200  $\mu$ g UC EVs group. (A)

3D- $\mu$ CT *in vivo* and *ex vivo* images of trabecular and cortical bone microstructure in OVX-PBS, OVX-200  $\mu$ g EVs, OVX-200  $\mu$ g UC EVs group, and Sham groups. **(B)** Images were further quantitatively analyzed by  $\mu$ CT. The parameters including BMD, tBMD, BV/TV, Tb.N, Tb.Th, Tb.Sp, Po.V (tot) , and Po (tot) were acquired. Data are expressed as mean  $\pm$  SD (\* $p$  < 0.05, \*\* $p$  < 0.01, \*\*\* $p$  < 0.005).

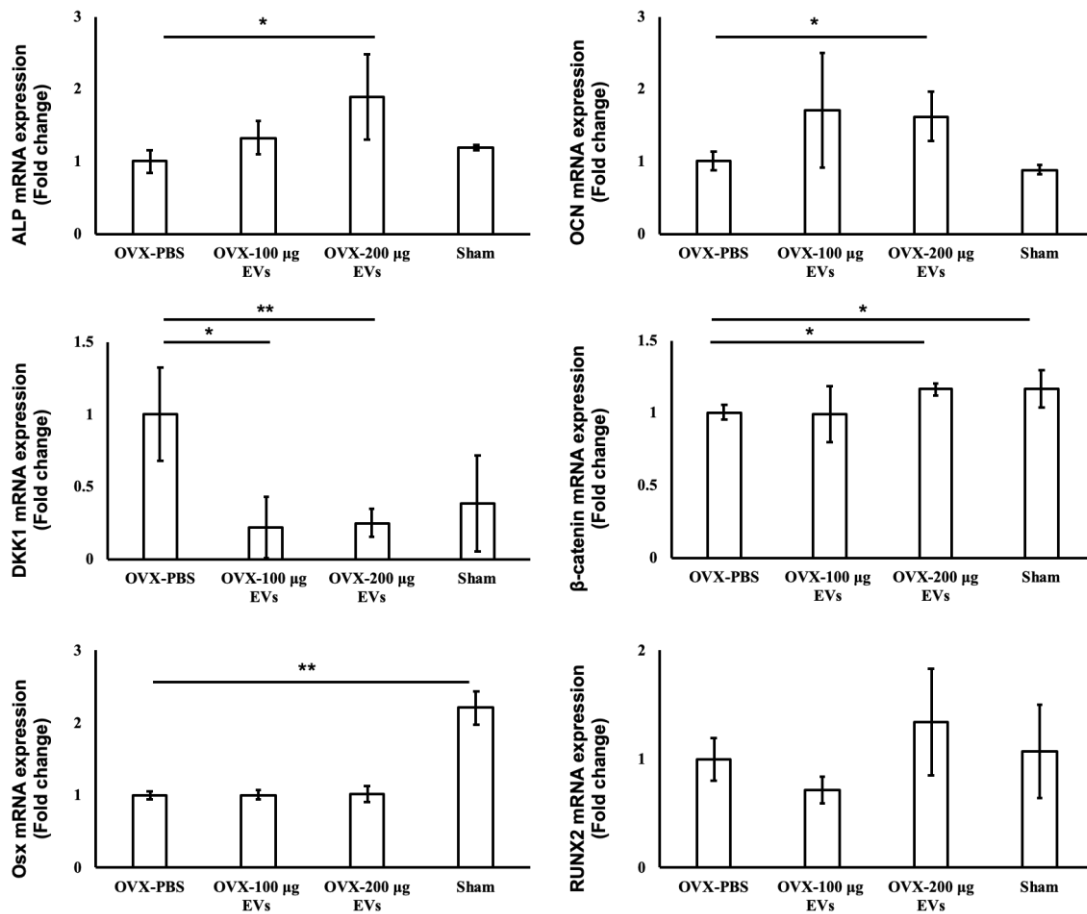

**Figure S5. Gene regulation by treatment using exogenous WJ-MSC-EVs in osteoporotic mice.**

The mRNA expression levels of ALP, OCN, DKK1, β-catenin, Osx, RUNX2 in bone tissues were calculated by qRT-PCR. Data are expressed as mean ± SD (\* $p < 0.05$ , \*\* $p < 0.01$ , \*\*\* $p < 0.005$ ).

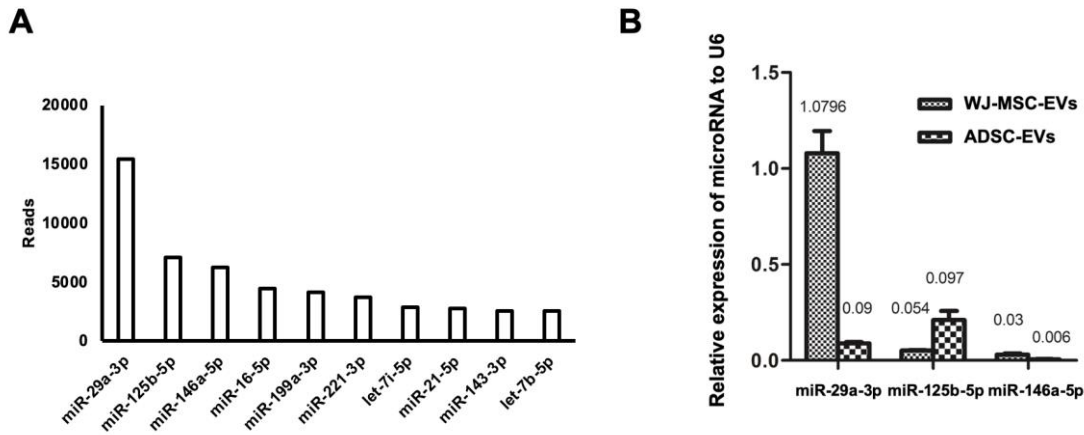

**Figure S6. miRNA NGS analysis of WJ-MSC-EVs.** (A) Top 10 most highly enriched miRNAs in WJ-MSC-EVs. (B) Comparing the top 3 enriched miRNAs in WJ-MSC-EVs with ADSC-EVs (Adipose tissue-derived stem cells secreted extracellular vesicles) by qPCR. Adapted from Chen YA, Lu CH, Ke CC, et al. Mesenchymal Stem Cell-Derived Exosomes Ameliorate Alzheimer's Disease Pathology and Improve Cognitive Deficits. *Biomedicines*. 2021;9(6). Creative Commons license and disclaimer available from: <http://creativecommons.org/licenses/by/4.0/legalcode>.<sup>1</sup>

**A**

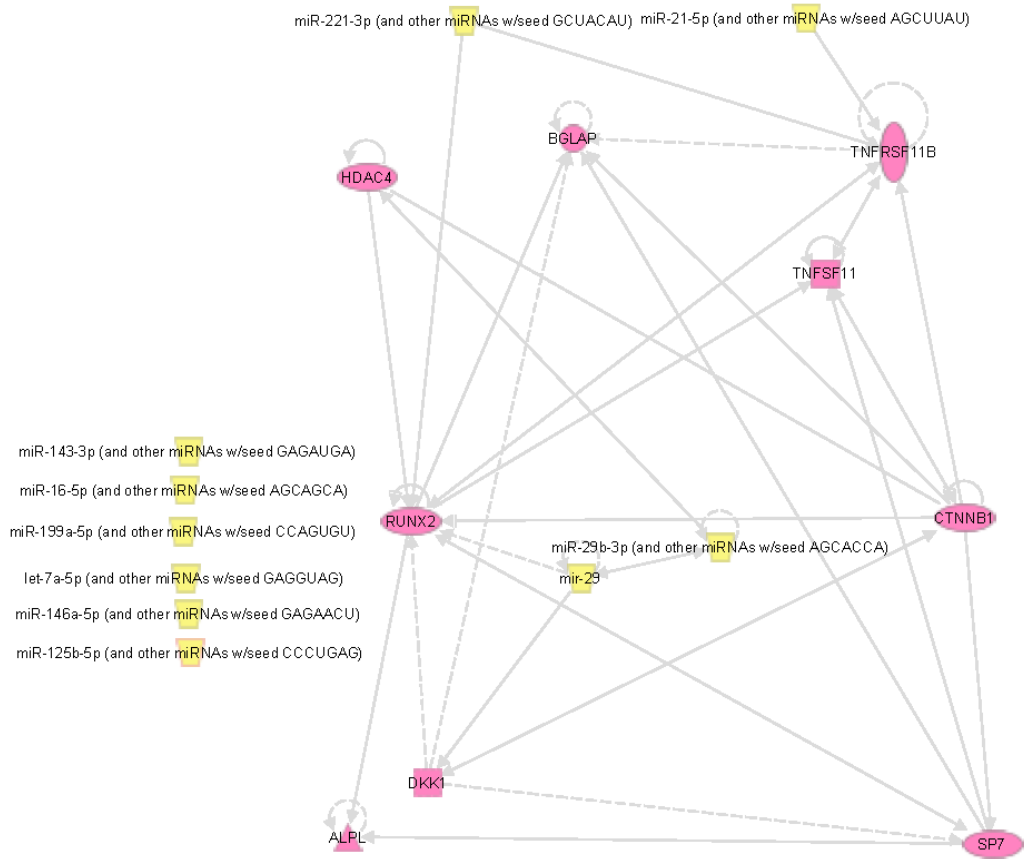



**B**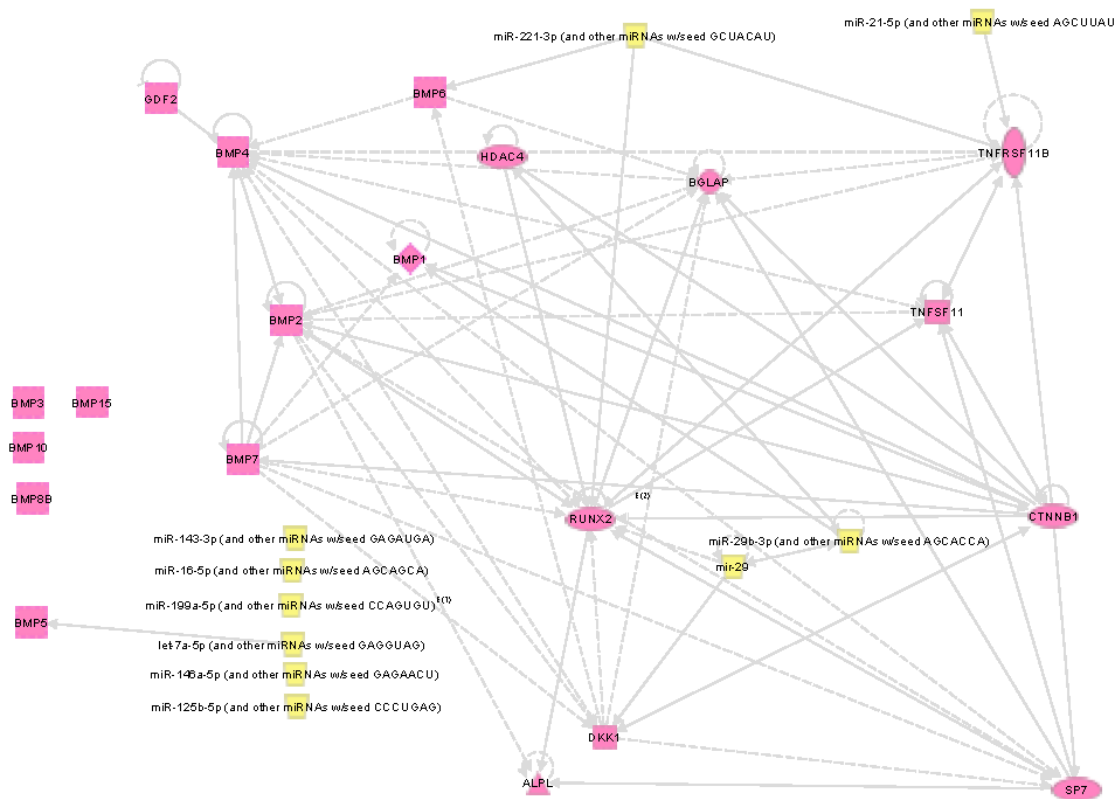**C**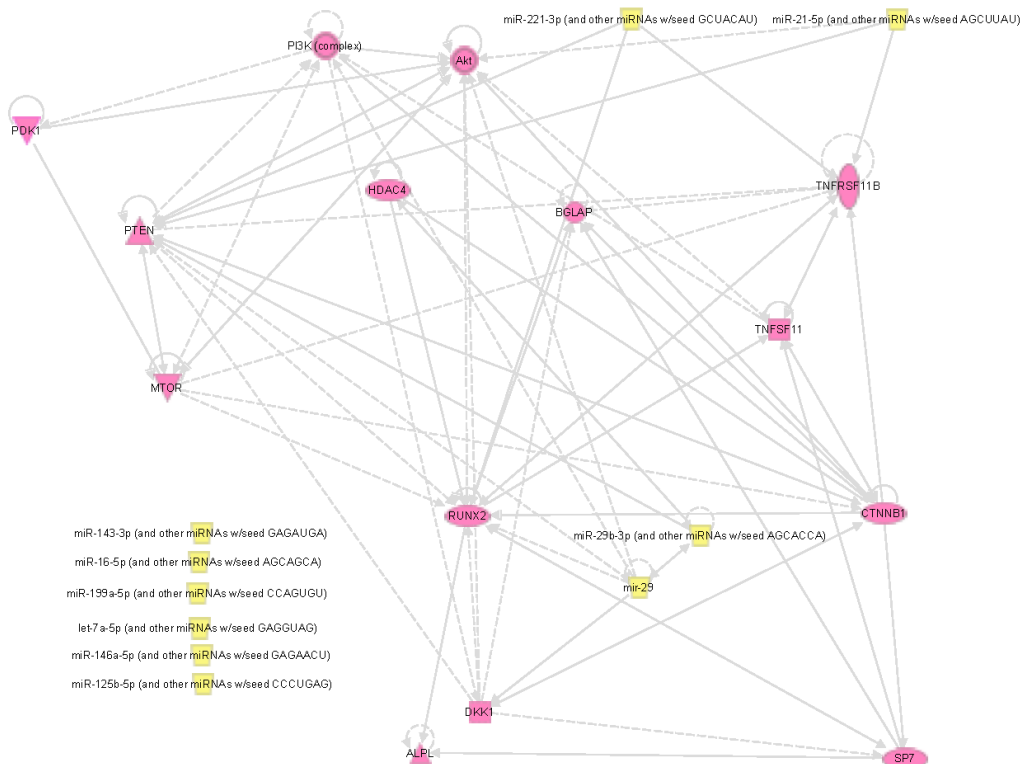

**Figure S7. IPA analysis of possible mechanism. (A)** The connections between top 10 enriched EV-

miRNAs and general markers of bone remodeling were illustrated. **(B)** In addition of canonical markers, supplementary analysis of connections between EV-miRNAs and BMP signaling pathway was illustrated. **(C)** Replacement of BMP signaling pathway, PI3K/AKT was selected in the analysis.

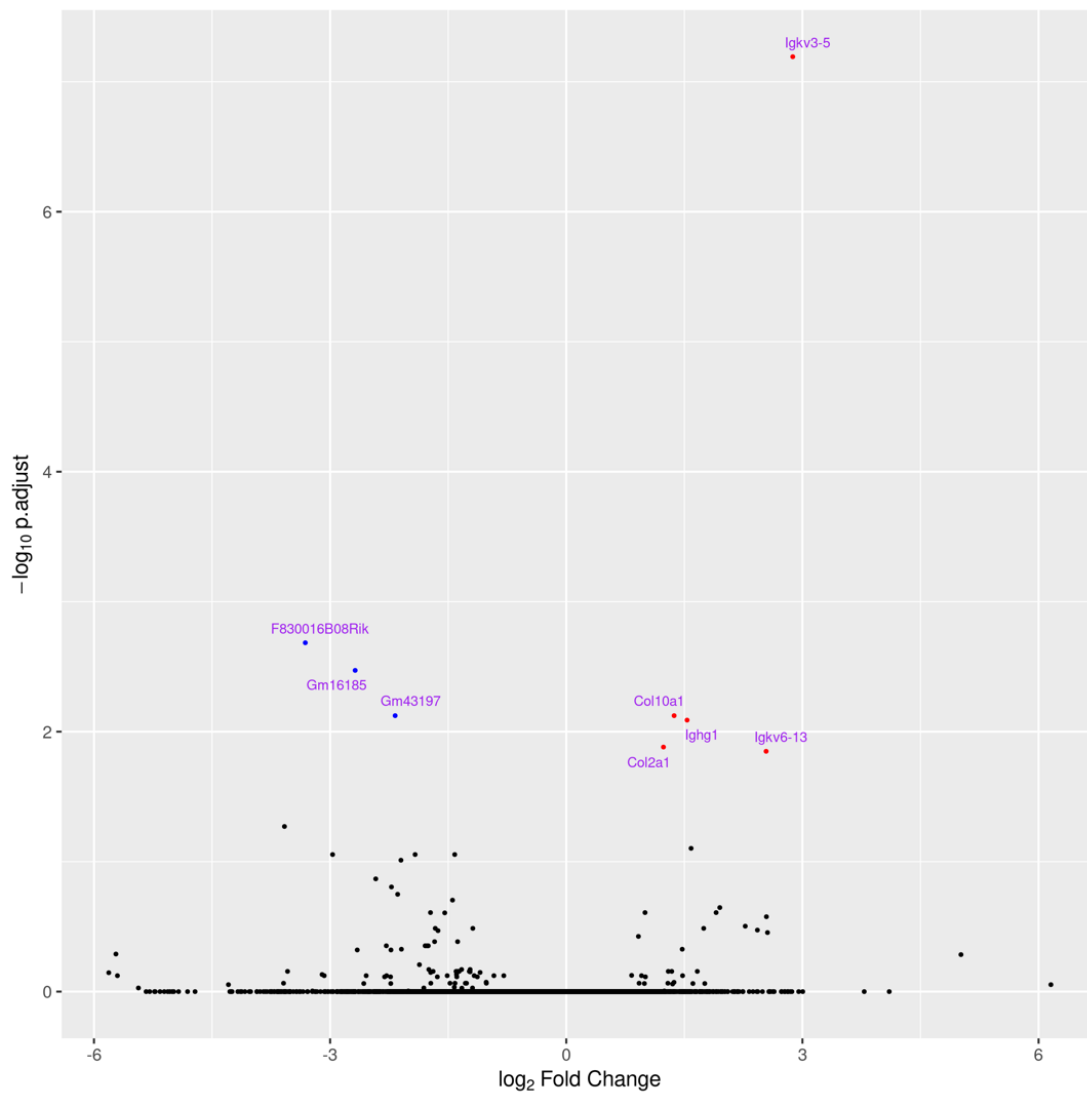

**Figure S8. Volcano plot of fold change of gene expression.** The screened DEGs illustrated by volcano map, the p-value was used to discriminate the significant change.

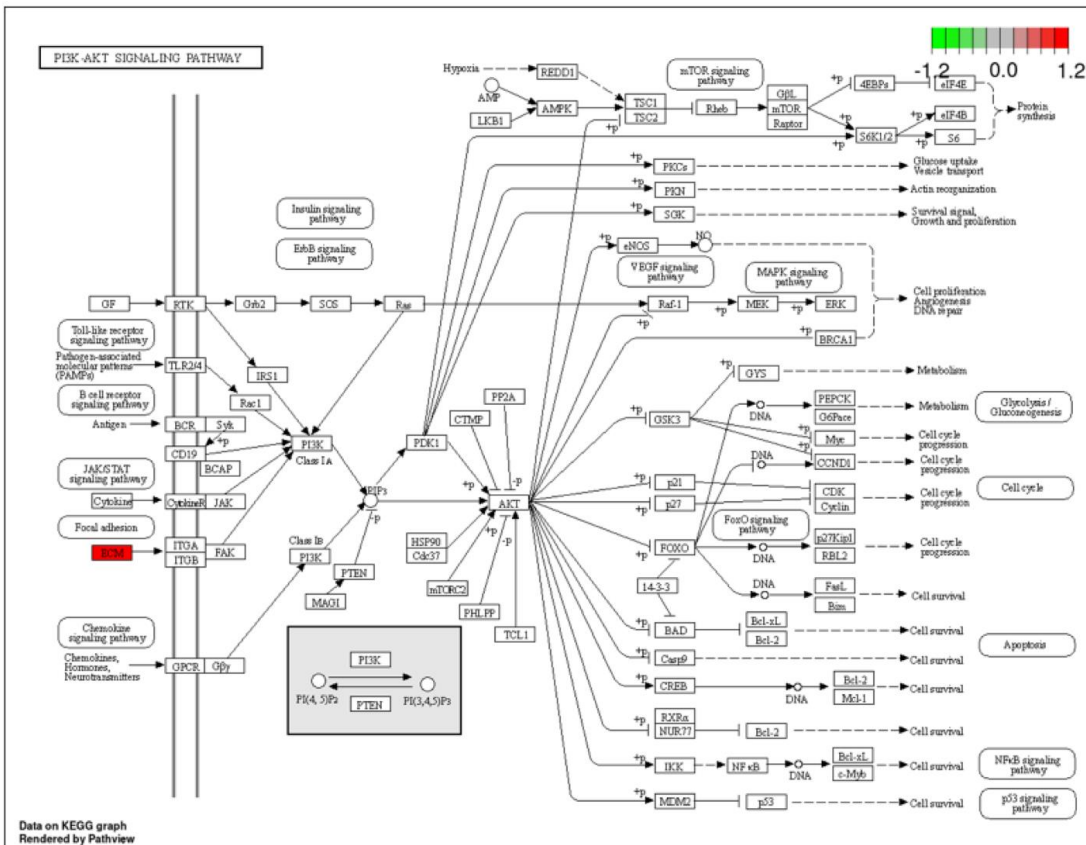

**Figure S9. Prediction of signaling pathways.** Use of the KEGG database to predict the significant alteration of potential molecules in OVX mice treated with exogenous WJ-MSC-EVs. Red: Up-regulated genes.

**Table S1. ROI analysis of  $\mu$ PET/CT images.**

| %ID/cc                 | 1 week          | 3 weeks         | 7 weeks         | 15 weeks        |
|------------------------|-----------------|-----------------|-----------------|-----------------|
| OVX-PBS                | 0.44 $\pm$ 0.03 | 0.39 $\pm$ 0.06 | 0.31 $\pm$ 0.02 | 0.33 $\pm$ 0.03 |
| OVX-200 $\mu$ g<br>EVs | 0.5 $\pm$ 0.01  | 0.57 $\pm$ 0.09 | 0.47 $\pm$ 0.08 | 0.35 $\pm$ 0.01 |
| Sham                   | 0.5 $\pm$ 0.03  | 0.49 $\pm$ 0.04 | 0.51 $\pm$ 0.05 | 0.40 $\pm$ 0.05 |

  

| SUVmean                | 1 week          | 3 weeks         | 7 weeks         | 15 weeks        |
|------------------------|-----------------|-----------------|-----------------|-----------------|
| OVX-PBS                | 0.09 $\pm$ 0.01 | 0.08 $\pm$ 0.01 | 0.06 $\pm$ 0.01 | 0.06 $\pm$ 0.01 |
| OVX-200 $\mu$ g<br>EVs | 0.1 $\pm$ 0.01  | 0.12 $\pm$ 0.02 | 0.09 $\pm$ 0.02 | 0.07 $\pm$ 0.01 |
| Sham                   | 0.1 $\pm$ 0.01  | 0.11 $\pm$ 0.01 | 0.1 $\pm$ 0.01  | 0.08 $\pm$ 0.01 |

**Quantitative ROIs of [ $^{18}$ F]NaF in distal femur at 1,3,7, and 15 weeks after OVX.** Each value represents mean  $\pm$  SD. Unit: %ID per cubic centimeter (%ID/cc); SUVmean, mean activity of standardized uptake values.

**Table S2. List of specific primers for genes used in RT-qPCR.**

| Gene (human) | Direction | Sequence (5'-3')      |
|--------------|-----------|-----------------------|
| ALP          | Forward   | GCCTGGCTACAAGGTGGTG   |
|              | Reverse   | GGCCAGAGCGAGCAGC      |
| OPG          | Forward   | GGCAACACAGCTCACAAGAA  |
|              | Reverse   | CTGGGTTTGCATGCCTTTAT  |
| DKK1         | Forward   | GATCATAGCACCTTGGATGGG |
|              | Reverse   | GGCACAGTCTGATGACCGG   |
| RUNX2        | Forward   | GGTACCAGATGGGACTGTGG  |
|              | Reverse   | GAGGCGGTCAGAGAACAAAC  |
| HDAC4        | Forward   | GGCCCACCGGAATCTGAAC   |
|              | Reverse   | GAACTCTGGTCAAGGGAAGT  |
| GAPDH        | Forward   | GAGTCAACGGATTTGGTCGT  |
|              | Reverse   | TTGATTTTGGAGGGATCTCG  |

| Gene (mouse) | Direction | Sequence (5'-3')       |
|--------------|-----------|------------------------|
| ALP          | Forward   | TGTGGAATACGAACTGGATGAG |
|              | Reverse   | ATAGTGGGAATGCTTGTGTCTG |
| OCN          | Forward   | GAGGACCATCTTTCTGCTCACT |

|                  |         |                           |
|------------------|---------|---------------------------|
|                  | Reverse | CGGAGTCTGTTCACTACCTTATTG  |
| Osx              | Forward | GAAAGGAGGCACAAAGAAG       |
|                  | Reverse | CACCAAGGAGTAGGTGTGTT      |
| DKK1             | Forward | GAGGTCCCGAAGTTGAGGTT      |
|                  | Reverse | GCAGAGAGCCATCATTGTAAAC    |
| $\beta$ -catenin | Forward | GCAGTCTTACTTGGATTCTGGA    |
|                  | Reverse | AGCCTTGCTCCCATTCATAA      |
| RUNX2            | Forward | GCCGGGAATGATGAGAACTA      |
|                  | Reverse | GGTGAAACTCTTGCCTCGTC      |
| GAPDH            | Forward | GGAGATTGTTGCCATCAACGA     |
|                  | Reverse | GAAGACACCAGTAGACTCCACGACA |

---

1. Chen YA, Lu CH, Ke CC, et al. Mesenchymal Stem Cell-Derived Exosomes Ameliorate Alzheimer's Disease Pathology and Improve Cognitive Deficits. *Biomedicines*. 2021;9(6).
